# Supplementary material for: Understanding the formation of CuS concave superstructures with peroxidase-like activity
Source: Royal Society of Chemistry journal article supplement (doi:10.1039/c2nr30310h), 2012-01-01
Supplement: c2nr30310h.pdf [file c2nr30310h.pdf]

***Supporting Information for:***  
**Understanding the formation of CuS concave superstructures  
with peroxidase-like activity**

Weiwei He<sup>a</sup>, Huimin Jia<sup>a</sup>, Xiaoxiao Li<sup>a</sup>, Yan Lei<sup>a</sup>, Jing Li<sup>a</sup>, Hongxiao Zhao<sup>a</sup>, Liwei Mi<sup>a</sup>, Lizhi  
Zhang<sup>b</sup>, Zhi Zheng<sup>a\*</sup>

<sup>a</sup> *Institute of Surface Micro and Nano Materials, Xuchang University, Xuchang 461000, P. R.  
China.*

<sup>b</sup> *Key Laboratory of Pesticide & Chemical Biology of Ministry of Education, College of  
Chemistry, Central China Normal University, Wuhan 430079, P. R. China.*

\*Address correspondence to the author. E-mail: [zhengzhi9999@yahoo.com.cn](mailto:zhengzhi9999@yahoo.com.cn)

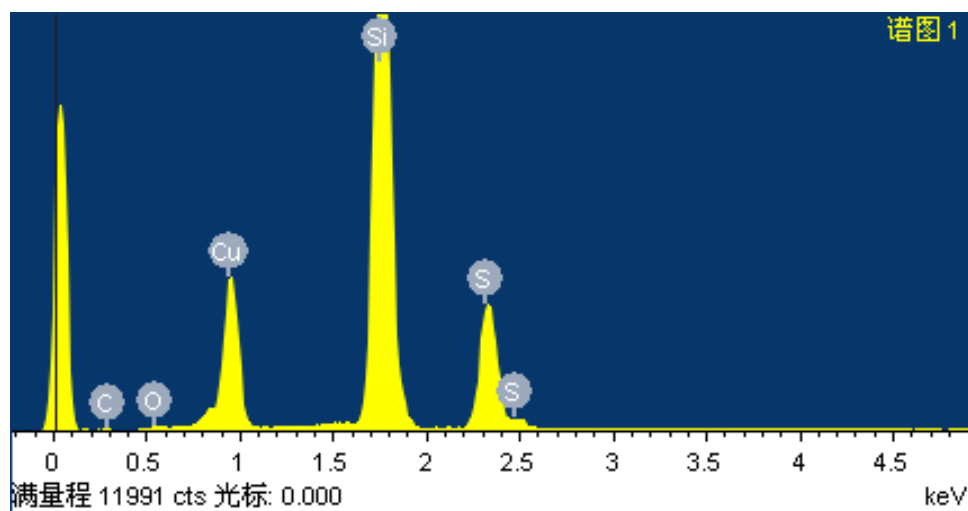

**Figure S1** Energy dispersive X-ray analysis (EDX) of the as-prepared CuS superstructures obtained at 180 °C for 12h. Si signal comes from the Si substrate supporting CuS sample in SEM observation.

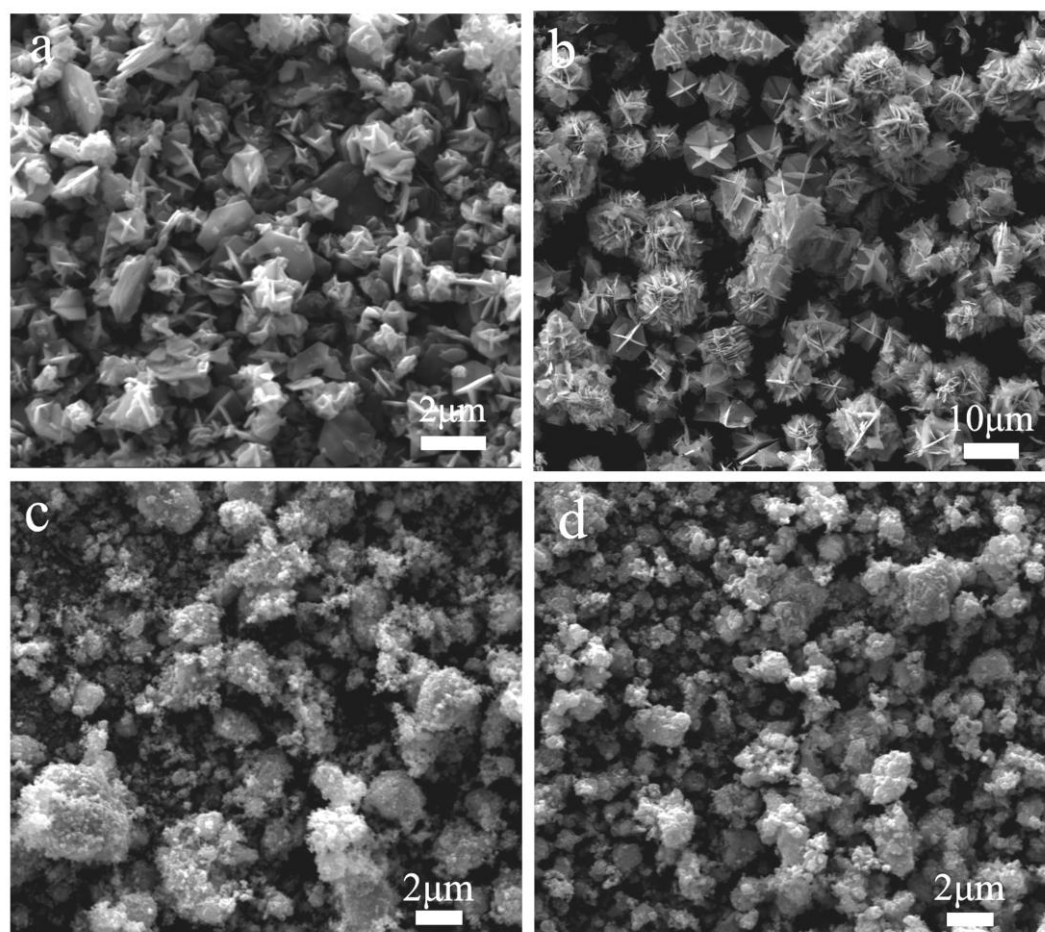

**Figure S2.** SEM images of CuS samples obtained by using different  $\text{Cu}^{2+}$  sources (sulfur powder as S source) and different S sources ( $\text{Cu}(\text{NO}_3)_2$  as  $\text{Cu}^{2+}$  source) at  $180^\circ\text{C}$  for 12 h. (a)  $\text{Cu}(\text{CH}_3\text{COO})_2 \cdot 5\text{H}_2\text{O}$ , (b)  $\text{CuCl}_2 \cdot 5\text{H}_2\text{O}$ , (c) thiourea and (d) thioacetamide. Conditions:  $0.25\text{mmol}$   $\text{Cu}^{2+}$  sources and  $0.5\text{mmol}$  S sources were added into 16 mL absolute ethanol.

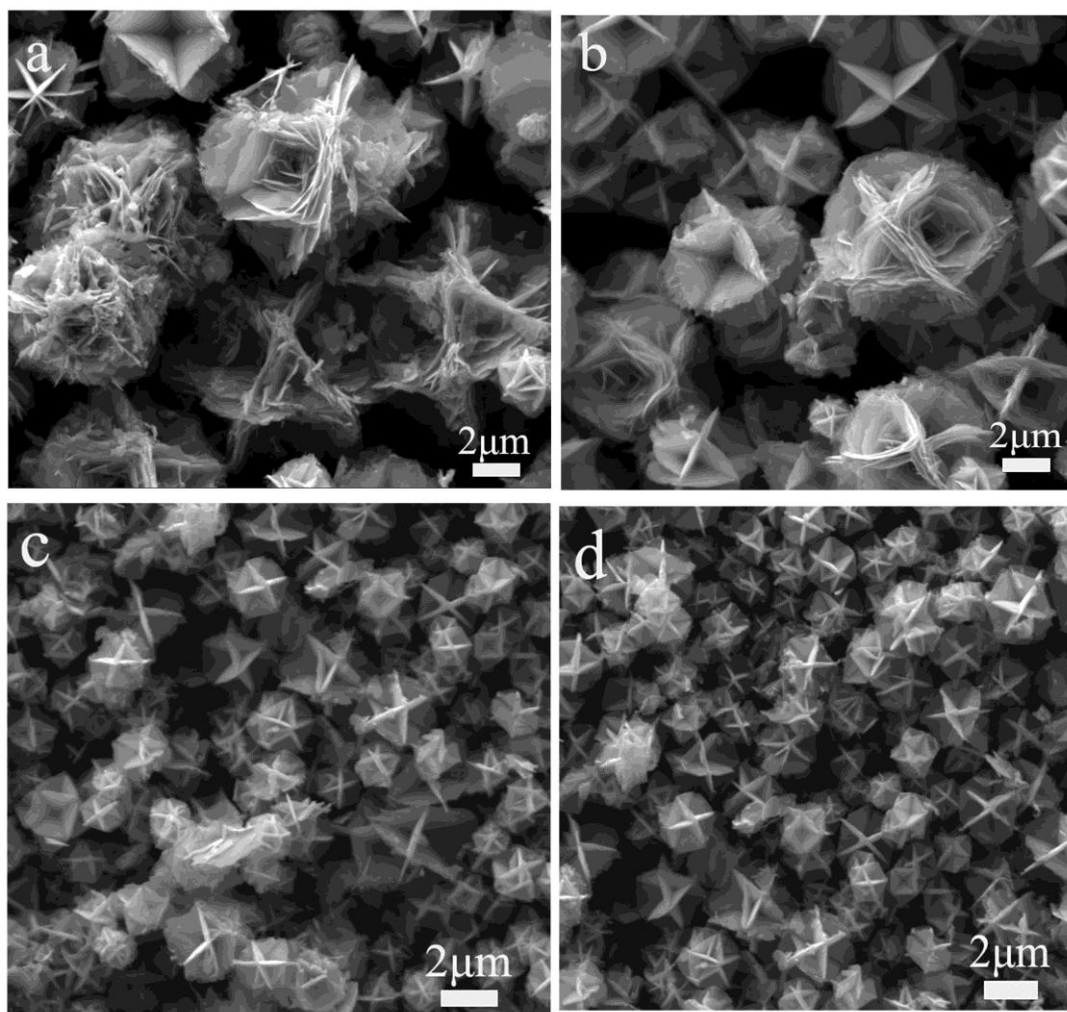

**Figure S3.** SEM images of the as-prepared CuS samples at different reaction temperature for 12 h. (a) 100 °C, (b) 120 °C, (c) 140 °C, (d) 160 °C.  $\text{Cu}^{2+}$  source: 0.25 mmol  $\text{Cu}(\text{NO}_3)_2$ , S source: 0.5 mmol sulfur powders.

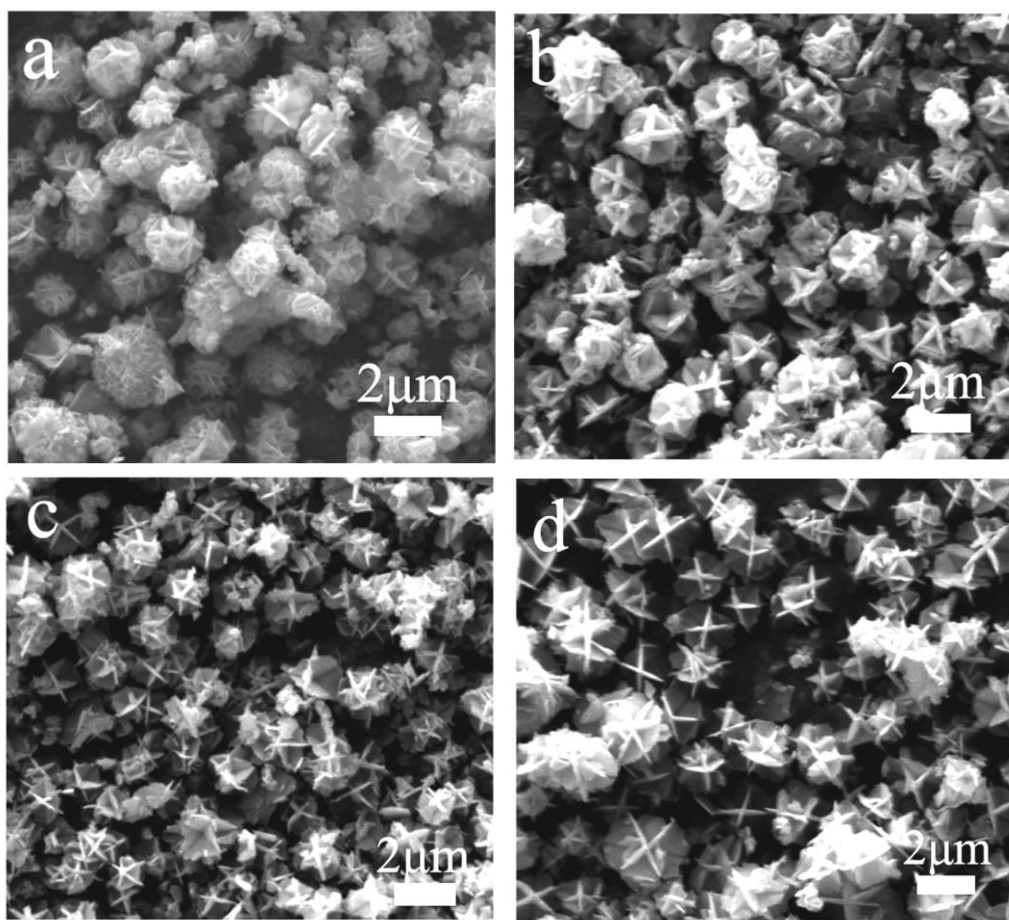

**Figure S4** SEM images of the as-prepared CuS samples at 180 °C for different solvothermal times. (a) 0.5 h, (b) 1.0 h, (c) 4.0 h, (d) 8.0 h.  $\text{Cu}^{2+}$  source: 0.25 mmol  $\text{Cu}(\text{NO}_3)_2$ , S source: 0.5 mmol sulfur powders.
